# 1 Three-dimensional beating dynamics 2 of *Chlamydomonas* flagella

3 Soheil Mojiri<sup>1</sup>, Sebastian Isbaner<sup>1</sup>, Steffen Mühle<sup>1</sup>, Hongje Jang<sup>1</sup>, Albert Johann  
4 Bae<sup>2†</sup>, Ingo Gregor<sup>1</sup>, Azam Gholami<sup>2\*</sup>, Jörg Enderlein<sup>1,3\*</sup>

**\*For correspondence:**

5 [azam.gholami@ds.mpg.de](mailto:azam.gholami@ds.mpg.de) (AG);  
6 [jenderl@gwdg.de](mailto:jenderl@gwdg.de) (JE)

**Present address:** <sup>†</sup>Department of  
7 Biomedical Engineering, University  
8 of Rochester, USA

5 <sup>1</sup>III. Institute of Physics – Biophysics, Georg August University, 37077 Göttingen,  
6 Germany; <sup>2</sup>Max Planck Institute for Dynamics and Self-Organization, Göttingen,  
7 Germany; <sup>3</sup>Cluster of Excellence “Multiscale Bioimaging: from Molecular Machines to  
8 Networks of Excitable Cells” (MBExC), Georg August University, 37077 Göttingen,  
9 Germany

---

11 **Abstract** Axonemes are the basic structure of motile cilia and flagella, and the investigation of  
12 how they function and move requires rapid three-dimensional imaging. We built a multi-plane  
13 phase-contrast microscope for imaging the three-dimensional motion of unlabeled flagella of the  
14 model organism *Chlamydomonas reinhardtii* with sub- $\mu\text{m}$  spatial and 4 ms temporal resolution.  
15 This allows us to observe not only bending but also the three-dimensional torsional dynamics of  
16 these small structures. We observe that flagella swim counter-clockwise close to a surface, with  
17 negatively-valued torsion at their basal and positively-valued torsion at their distal tips. To  
18 explain the torsional dynamics and signature, we suggest the existence of an intrinsic negative  
19 twist at the basal end that is untwisted by active positive-twist-inducing dynein motor proteins.  
20 Moreover, dyneins walking towards the basal induce an opposite twist at the distal tip. Bending  
21 of the whole axoneme structure then translates this twist into an observable torsion. This  
22 interconnection between chiral structure, twist, curvature, and torsion is fundamental for  
23 understanding flagellar mechanics.

---

25 Flagellar and ciliary motion is fundamentally important for life. Flagella of single-celled organ-  
26 isms are required for locomotion in fluids and thus photo- and chemotaxis. Flagella drive sperm  
27 cells to the egg for fertilization. Carpets of cilia on the respiratory epithelium are life-important  
28 for mucociliary clearance of the airways of large animals or for active fluid transport in the brain  
29 *Wanner et al. (1996); Brooks and Wallingford (2014); Pellicciotta et al. (2019); Faubel et al. (2016)*.  
30 Motion of nodal cilia is necessary for correct embryo development *Hirokawa et al. (2006); Satir*  
31 *and Christensen (2007); Smith et al. (2019)*. Thus, understanding the mechanism and dynamics  
32 of motile flagella and cilia is of paramount importance. Their cytoskeletal core, the axoneme, is  
33 a highly conserved structure. It consists of nine microtubule doublets (MTDs) forming a cylinder  
34 that surrounds a tenth pair of microtubules on its axis, with the outer MTDs being decorated with  
35 dynein motor proteins. Both the radial and longitudinal polarities of the axonemal structure *Bui*  
36 *et al. (2012)* introduce an inherent chirality of its structure. This can be seen by the orientation of  
37 the dynein-decorated MTDs around the central MTD. Fueled by hydrolyzation of adenosine triphos-  
38 phate (ATP), asymmetric activity of dyneins *Brokaw and Kamiya (1987); Bui et al. (2012); Lin and*  
39 *Nicastro (2018)* slides neighboring MTDs with respect to each other which drives a regular motion  
40 in an intact axoneme *Brokaw (1989); Sanchez et al. (2011)*.

41 One of the most prominent examples of a flagellum-based motile system is the single cellular bi-  
42 flagellate green alga *Chlamydomonas reinhardtii* which swims in a breaststroke manner using both

43 stochastic and in-phase flagellar beats *Goldstein et al. (2009)*; *Polin et al. (2009)*; *Wan et al. (2014)*.  
44 The grown flagella of *Chlamydomonas* have a quite stable length between 10 and 12  $\mu\text{m}$  *Hendel*  
45 *et al. (2018)*; *Orbach and Howard (2019)*, which has recently been shown to be the optimum length  
46 for efficient mechanical beating *Bottier et al. (2019)*. *Chlamydomonas* has been extensively studied  
47 as a biological model system to elucidate flagella-driven propulsion *Ringo (1967)*; *Brokaw and Luck*  
48 *(1983)*; *Guasto et al. (2010)*. Detachment and isolation of flagella from the *Chlamydomonas* cell  
49 body *Craige et al. (2013)*; *Witman (1986)* tremendously facilitates the study of their structure and  
50 dynamics, from the level of a full axoneme down to individual microtubules. In particular, it allows  
51 to investigate the mechanism of pure axonemal motion in a highly controlled and reproducible  
52 manner *Bessen et al. (1980)*; *Geyer (2013)*.

53 In this work, we study the motility of isolated wild-type reactivated axonemes of *Chlamydomonas*.  
54 The majority of published literature considers *Chlamydomonas* flagellar beating and the mecha-  
55 nisms behind purely in two dimensions *Brokaw (1971)*; *Witman et al. (1978)*; *Lindemann (1994)*;  
56 *Riedel-Kruse et al. (2007)*; *Mitchison and Mitchison (2010)*; *Sartori et al. (2016b)*; *Lin and Nicastro*  
57 *(2018)*. Although observation of non-planar flagellar motion has been reported for various micro-  
58 swimmers such as human sperm *Ishijima et al. (1986)*; *Gadêlha et al. (2019)*; *Su et al. (2012)*, bull  
59 sperm *Merola et al. (2013)*; *Daloglu and Ozcan (2017)*, sea urchin sperm *Gong et al. (2020)*; *Jikeli*  
60 *et al. (2015)*, the alga *Euglena's* flagellum *Rossi et al. (2017)*, or *P. berghei* microgametes *Wilson*  
61 *et al. (2013)*, nearly all experimental studies of *Chlamydomonas* axoneme motility were purely two-  
62 dimensional. This is due to the fact that *Chlamydomonas* axonemes are almost three to five times  
63 shorter and faster ( $\sim 50$  Hz beat frequency) than flagella of typical sperm cells. Therefore, real-time  
64 3D investigation of flagellar motion requires a rapid imaging technique with high spatial resolution.

65 Here, we present a novel multi-plane phase-contrast microscope that combines a recently de-  
66 veloped multi-plane beam-splitter *Geissbuehler et al. (2014)*; *Descloux et al. (2018)* with a Zernike  
67 phase-contrast optics to enable rapid, label-free, robust and easy-to-use 3D imaging of flagellar mo-  
68 tion. Our multi-plane phase-contrast microscope allows for the simultaneous recording of eight  
69 axially stacked images with several hundred frames per second. In contrast to quantitative phase  
70 imaging or light-field imaging, our system does not require any reference image for image recon-  
71 struction, and it provides real-time 3D observation of rapidly moving samples with excellent signal-  
72 to-noise ratio (SNR) in a robust and straightforward manner.

## 73 Results

74 A schematic of our new custom-built multi-plane phase-contrast microscope is shown in Fig. 1 (for  
75 details see Methods section and Appendix 1). The system allows for parallel recording of eight wide-  
76 field images in eight focal planes that are evenly spaced along the optical axis (inter-plane distance  
77 335 nm). Using this system, we recorded movies of beating axonemes with 272 volumes per sec-  
78 ond. An example of four of such consecutively taken volumetric images are shown in Fig. 2a, where  
79 the color encodes the third dimension. In each of the volumetric images, the three-dimensional  
80 contour of an axoneme was discretized, and the resulting discrete lateral  $x_j$  and  $y_j$  and axial  $z_j$   
81 positions were fitted with polynomial functions (for details see Methods section). The result is  
82 a four-dimensional representation  $\mathbf{r}(s,t)$  of an axoneme's contour as a function of time  $t$  and arc  
83 length  $s$ , where we have  $|\partial\mathbf{r}(s,t)/\partial s| \equiv |\mathbf{r}'(s,t)| = 1$ . Discretized contours and fit results for the four im-  
84 ages in Fig. 2a are presented in Fig. 2b. As seen from the projections into the different coordinate  
85 planes, the discretized axial positions show a  $\sim 10$ -fold bigger jitters than the lateral positions. We  
86 estimated the accuracy of the polynomial contour fit from the standard deviations between fitted  
87 and discretized position values, and find a lateral position accuracy better than 20 nm, and an axial  
88 position accuracy better than 120 nm (see Fig. 12 in Appendix 4).

89 From the polynomial representation of the axoneme contours, spatio-temporal profiles of cur-  
90 vature  $\kappa(s,t)$  and torsion  $\tau(s,t)$  are calculated by *Do Carmo (2016)*

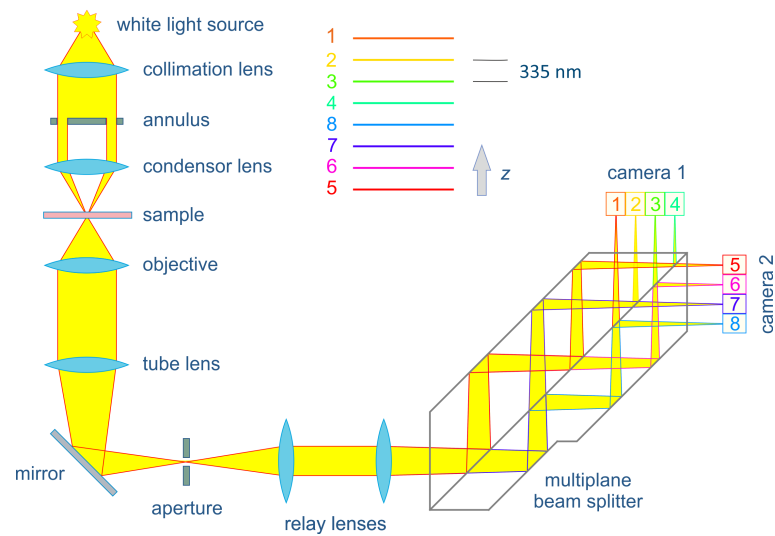

**Figure 1.** Schematic of the multi-plane phase-contrast microscope. Light from a white-light source is sent through an annular aperture and focused onto the sample for high-angle illumination. Transmitted and scattered light are collected with a Zernike phase-contrast objective (oil immersion, 60× magnification, 1.25 NA), focused by the tube lens through a slit aperture, and then sent through two relay lenses (that increase magnification to 80×) towards a custom-made multi-plane beam splitter. This splitter generates eight laterally shifted image replicas with increasingly longer optical path length, corresponding to eight different focal planes in the sample. These eight images correspond to eight focal planes in the sample separated by 335 nm (in aqueous solution), and they are recorded by two sCMOS cameras. The slit aperture limits the field-of-view and prevents overlap between neighboring images on the cameras.

$$\kappa(s, t) = |\mathbf{r}''(s, t)| \quad (1)$$

$$\tau(s, t) = \frac{[\mathbf{r}'(s, t) \times \mathbf{r}''(s, t)] \cdot \mathbf{r}'''(s, t)}{\kappa^2(s, t)} \quad (2)$$

91 where a prime denotes differentiation with respect to arc length  $s$ . It should be emphasized that  
 92 torsion quantifies the out-of-plane bending of an axoneme and can only be extracted from its full  
 93 three-dimensional contour.

94 We measured the contour dynamics of 35 axonemes in a normal aqueous-like swimming medium.  
 95 All observed axonemes move close and parallel to the coverslide surface of the observation cham-  
 96 ber, due to hydrodynamic interactions with the surface *Lighthill (1976); Elgeti et al. (2010)*. All  
 97 except one of them showed a counter-clockwise (ccw) circular motion (when viewed from above).  
 98 For further analysis, here we present two ccw moving flagella with nearly identical swimming ra-  
 99 dius and beat frequency ( $\sim 73$  Hz, determined from Fourier power spectra of space-time curvature  
 100 plots). Projections ( $x, y$ -coordinates) of the swimming contours of the basal end and distal tip for  
 101 both flagella are shown in Figs. 3a and 3c. The basal end traces a smaller circle and swims closer  
 102 to the surface than the distal end and clearly follows a helical path (see Fig. 2b and supplemental  
 103 movies 'Video1' and 'Video2').

104 Space-time plots of curvature and torsion for both flagella are presented in Figs. 3b and 3d  
 105 (see supplemental movies 'Video1' and 'Video2' for the corresponding three-dimensional flagellar  
 106 motion). The plots show curvature waves that start at the basal end ( $s = 0$ ) and move towards the  
 107 distal tip. This is accompanied by torsion waves that start with negative torsion values at the basal  
 108 end and gradually change sign until they finish with positive torsion values at the distal tip. This  
 109 torsion wave dynamics is nearly identical for both the presented axonemes.

110 The observed bending and torsion dynamics demonstrates the fundamentally *three-dimensional*  
 111 nature of flagellar motion. We propose that the observed torsional waves are closely connected

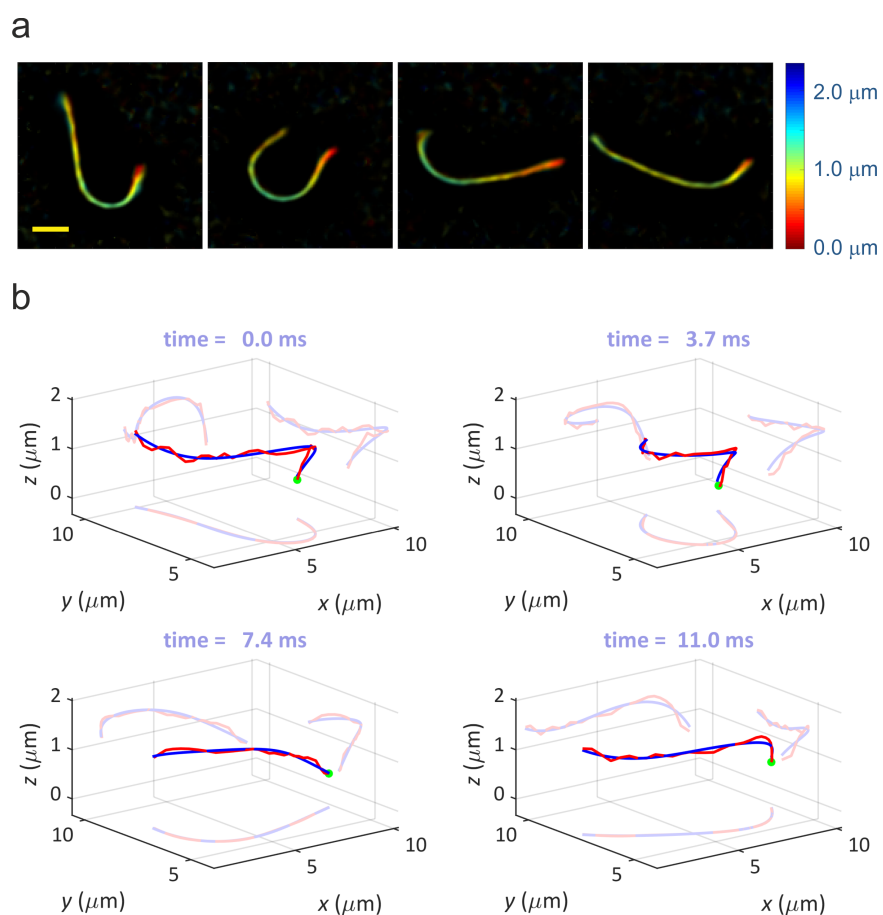

**Figure 2.** Three-dimensional recording of axoneme motion. (a) Four consecutive raw images recorded with the multi-plane phase-contrast microscope. Color encodes the axial position (see color bar), the yellow bar in the leftmost panel has a length of 2  $\mu\text{m}$ . (b) Discretized axoneme contours (red) and fitted polynomial curves (blue) for the four images shown in (a). For better visibility, the respective projections into the three coordinate planes are also shown. The green dot indicates the basal end of the axoneme.

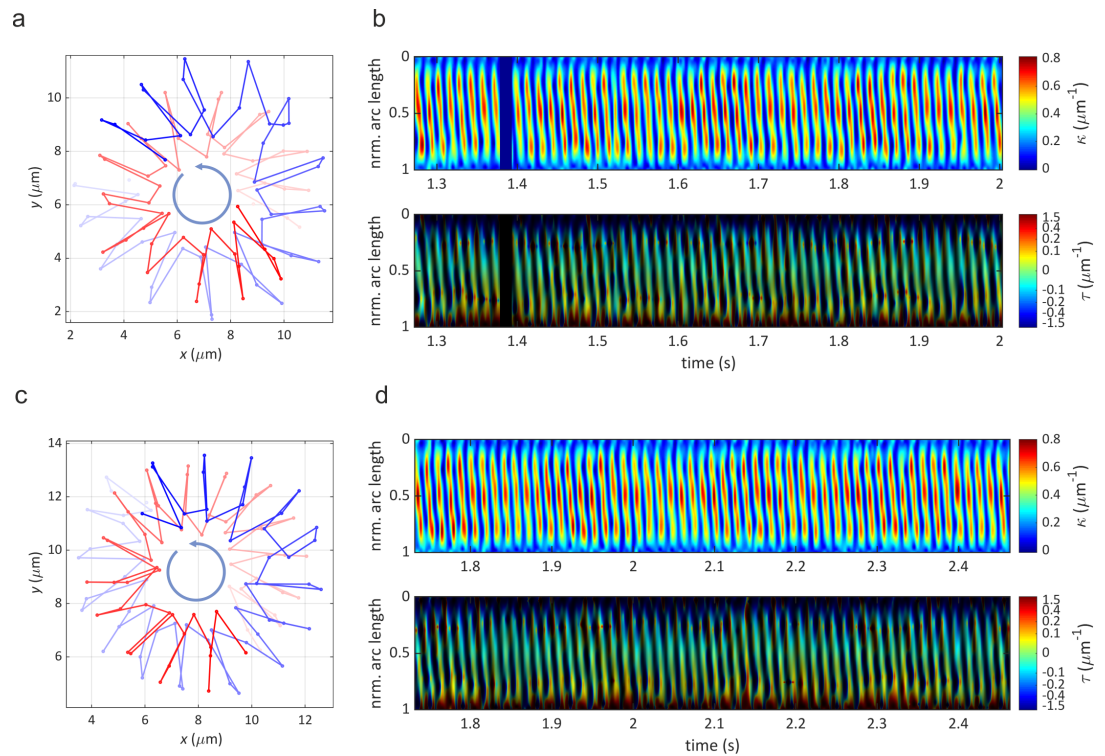

**Figure 3.** Analysis of flagellar motion. (a,c) Circular motion of basal end (red) and distal (blue) tip of two ccw-moving flagella as seen from above the surface. From light to dark shading indicates progression in time. Time between two discrete points of trajectory is 3.7 ms. (b,d) Space-time plots of curvature and torsion for the same flagella as shown in (a,c), over an observation time of  $\sim 0.7$  s. The dark vertical lane at  $\sim 1.4$  s corresponds to a short excursion of the distal tip of the flagellum beyond the axial range of our observation volume and was excluded from analysis. Vertical axis is the *normalized* arc length ( $s = 0$  at basal end,  $s = 1$  at distal tip). In the torsion plots, color encodes torsion values, while brightness is proportional to curvature. This suppresses nonphysical torsion values in regions of low or zero curvature, where torsion is ill-defined. Note also the strongly non-linear color mapping (see color bar) which is used to make small torsion values better visible.

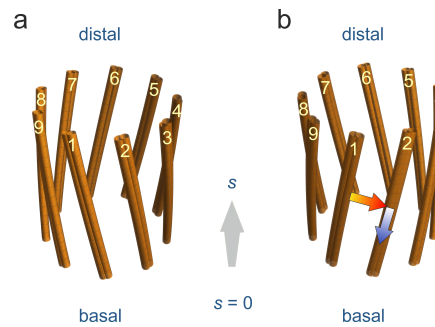

**Figure 4.** Twist of an axonemal structure. Shown are the nine MTDs around the circumference of an axoneme. (a) Intrinsic sinistral twist close to the basal end. (b) dynein-induced dextral twist close to the distal tip. The red arrow indicates the direction along which dynein motors reach from their MTD of attachment to the neighboring MTD on which they act. The blue arrows indicate the walking direction of the dynein motors. The action of the dyneins leads to sliding of MTDs with respect to each other. Due to structural connections between MTDs (e.g. by nexin proteins), this is likely to induce local twists of the axoneme structure, as shown in 4(b). If the whole structure is additionally bent, this twist would translate into torsion (with corresponding to twist sign), as experimentally observed at the basal end and distal tip of the bare axonemes.

112 to the intrinsic chiral structure of the axoneme and to twist induced by dyneins. According to the  
113 model developed in Refs. *Brokaw (2002)* and *Sartori et al. (2016a)*, dynein motors induce sliding  
114 between neighboring MTDs which does not only drive axoneme bending but also induces twisting  
115 of the axoneme. Dyneins transiently attach with their MT binding domains to neighboring MTDs  
116 and walk towards the basal end which cause distal-oriented sliding forces between neighboring  
117 MTDs *Lin et al. (2014)*. In an untwisted axoneme, such a motion will induce a positive twist (as  
118 seen from the basal end) which should be observable as a positive torsion in a bend axoneme. Be-  
119 cause we observe a repetitive negative torsion in each beat cycle close to the basal end we suggest  
120 the existence of an intrinsic negative twist at the beginning of each beat cycle. This is visualized in  
121 Fig. 4a as a side view of sinistrally twisted MTDs close the basal plate of an axoneme to which the  
122 axonemal MTDs are fixed (note that numbering of MTDs in this figure follows Ref. *Dutcher (2020)*).  
123 Then, action of the dyneins unwinds this negative intrinsic twist, reducing negative torsion at the  
124 basal end but generating positive twist and torsion at the initially twist- and torsion free distal end  
125 (Fig. 4b). Such change in torsion sign has been observed also in quail sperm flagella *Woolley and*  
126 *Vernon (1999)*. Any bending of the axoneme will automatically translates twist into torsion with the  
127 same sign.

## 128 Discussion and Conclusion

129 We have developed a novel multi-plane phase-contrast microscope that allows for volumetric imag-  
130 ing with close to diffraction-limited resolution and with rates of several hundred volumes per sec-  
131 ond. In our application of imaging *Chlamydomonas* axonemes we have chosen such a magnifica-  
132 tion so that the eight image planes cover a volume of  $\sim 2.5 \mu\text{m}$  depth. For applications that require  
133 imaging over a deeper volume, this depth value can be easily changed by changing magnifica-  
134 tion. Using our microscope, we resolved the rapid ATP-driven motion of demembranated *Chlamy-*  
135 *domonas* flagella in three dimensions. We were able to reconstruct the spatio-temporal dynamics  
136 of curvature and torsion of axonemes and proposed that the observed torsional waves are due to  
137 dynein-generated axoneme twisting determined by axoneme structural chirality and dynein walk-  
138 ing direction. Torsion waves start with a negative sign at the basal end and gradually change sign  
139 while propagating towards the distal tip. We attribute the negative sign of torsion to a left-handed  
140 twist at the proximal side which slowly switches to a right-handed twist as we move towards the  
141 distal tip. Since dyneins are minus-directed molecular motors, active torque generation of accu-  
142 mulated dyneins at the distal tip of axonemes can generate a right-handed twist, consistent with  
143 the sign of the positive torsion observed at this location. We hypothesize that the left-handed twist

144 at the basal end is a passive structural twist that exists independent of activity of dynein motors.  
145 In future studies, it would be highly interesting to see whether this connection between torsion  
146 dynamics and structural twist can be corroborated, for example by electron-microscopy of flagella.  
147 Also, which type of dyneins contribute to non-planar motion requires further investigations.

## 148 **Methods**

### 149 **Multi-plane phase-contrast microscope**

150 Our custom-built multi-plane phase-contrast imaging system (Fig. 1) is established on a commer-  
151 cial IX71 microscope from Olympus. The collimated light of a white-light source (Halogen Lamp  
152 U-LH100L-3) is send through a condenser annulus (IX-PH3, Olympus) and focused by a condensor  
153 lens (IX2-LWUCD, Olympus) onto the sample (Köhler illumination). Scattered and transmitted light  
154 are collected by a Zernike phase contrast objective (UPLFLN 60XOIPH, Olympus, 1.25 NA, 60x mag-  
155 nification) which shifts the phase of the transmitted light by  $-\pi/2$  with respect to the scattered light  
156 resulting in destructive interference between scattered and non-scattered light. This provides a  
157 phase contrast image when focused by the tube lens onto a camera. Before imaging, a custom-  
158 made multiple beam-splitter prism splits the collected light into eight beams with different optical  
159 path lengths corresponding to eight different focal planes in the sample (see section 6.2 in the SI  
160 of Ref. *Descloux et al. (2018)* for a detailed explanation of the prism design). These focal planes  
161 are equally spaced with a distance of  $\sim 335$  nm along the optical axis, thus spanning a total volume  
162 of  $\sim 2.4$   $\mu\text{m}$  depth (see Fig. 1 in Appendix 1 for calibration of the distances between focal planes).  
163 Four of the light beams exit the beam-splitter prism in a direction parallel to the incoming light,  
164 and four exit the prism in a perpendicular direction. Each set of these four beams is imaged onto  
165 a separate camera in such a way that the images of the different focal planes are positioned next  
166 to each other on the camera chip (see Fig. 1a,b in Appendix 2). The rectangular field stop aper-  
167 ture in the focal plane of the tube lens adjusts the field of view and to prevent overlap between  
168 adjacent images on the cameras. Since the geometry and refractive index of the prism is fixed,  
169 the inter-plane distance can be changed only by changing the magnification of the imaging system  
170 (see Appendix 1 for 'setup calibration'). Image acquisition by the two cameras is synchronized with  
171 an external trigger. Data acquisition is controlled by the open-source microscopy software Micro-  
172 Manager (<https://micro-manager.org/>). Table 1 lists the specifications of all optical components of  
173 the setup. A detailed procedure of data processing before 3D axoneme tracking is explained in  
174 Appendix 2.

### 175 **Axoneme isolation and reactivation**

176 Axonemes are isolated from wild-type *Chlamydomonas reinhardtii* cells, strain SAG 11-32b. They  
177 were grown axenically in TAP (tris-acetate-phosphate) medium on a 12 h/12 h day-night cycle. Flag-  
178 ella were isolated using dibucaine *Witman (1986); Alper et al. (2013)*, then purified on a 25% sucrose  
179 cushion, and demembrated in HMDEK (5 mM  $\text{MgSO}_4$ , 30 mM HEPES-KOH, 1 mM EGTA, 50 mM  
180 potassium acetate, 1 mM DTT, pH 7.4) supplemented 0.2 mM Pefabloc. The membrane-free ax-  
181 onemes were re-suspended in HMDEK plus 1% (w/v) polyethylene glycol ( $m_w = 20$  kg/mol), 30% su-  
182 crose, 0.2 mM Pefabloc and stored at  $-80^\circ\text{C}$ . To perform reactivation experiments, axonemes were  
183 thawed at room temperature, then kept on ice and were used for up to 1 hr. Thawed axonemes  
184 were diluted in HMDEKP reactivation buffer containing 1 mM ATP and infused into 100  $\mu\text{m}$  deep  
185 flow chambers, built from cleaned glass and double-sided tape. The glass surface was blocked us-  
186 ing casein solution (from bovine milk, 2 mg/mL) to avoid attachment of axonemes to the substrate.

### 187 **Axoneme contour tracking**

188 Tracking and contour fitting for observed axonemes is split into two parts: In a first step, a 2D  
189 maximum projection image (along the optical axis) is generated. Tracking of this 2D image is done  
190 using a gradient vector flow snake *Xu and Prince (1997); Xu et al. (1998)*. In a second step, the axial

191 position ( $z$ ) of each segment is found by fitting a 1D Gaussian to its intensity profile along the  $z$ -axis  
192 at fixed  $(x,y)$ -positions (see Appendix 3). The tracking routine yields a discrete approximation of an  
193 axoneme's contour represented by a set of 30 three-dimensional positions  $\mathbf{r}_i = (x_i, y_i, z_i)$ ,  $i = 1 \dots 30$ .  
194 For each time frame, these points constitute a polygonal chain, which is least-square fitted with  
195 polynomial functions of the form  $\sum_{m=0}^M c_m i^m$ , where the  $c_m$  are fit coefficients. We have set  $M = 6$   
196 (6<sup>th</sup> order polynomial) for fitting the lateral  $x,y$ -positions, and  $M = 3$  (3<sup>rd</sup> order polynomial) for the  
197 axial  $z$ -positions.

198 To suppress nonphysically large curvature values at the contour ends, we regularized the con-  
199 tour by extending it on both ends with short mirror-symmetric patches before polynomial fitting.  
200 More precisely, at the  $i = 1$  end, we add additional points via  $\mathbf{r}_{1-j} = 2\mathbf{r}_1 - \mathbf{r}_{1+j}$ , and at the  $i = 30$  end,  
201 via  $\mathbf{r}_{30+j} = 2\mathbf{r}_{30} - \mathbf{r}_{30-j}$ . This changes the absolute curvature values at the ends of a flagellum, but  
202 impacts only slightly the results in the middle (see Fig. 1 in Appendix 4). For our final analysis, we  
203 have chosen a padding with three additional points on each end.

## 204 Acknowledgment

205 SH thanks the European Research Council for financial support of his position via the International  
206 Trainee Network (ITN) BE-OPTICAL (grant number 675512). SM and JE acknowledge financial sup-  
207 port by the Deutsche Forschungsgemeinschaft (DFG, German Research Council) via the Collabora-  
208 tive Research Center SFB 937 "Collective behavior of soft and biological matter," project A11. AG  
209 and AB acknowledge support by MaxSynBio Consortium, which is jointly funded by the Federal Min-  
210 istry of Education and Research of Germany and the Max Planck Society. A.G. thanks M. Lorenz and  
211 the Göttingen Algae Culture Collection (SAG) for providing the *Chlamydomonas reinhardtii* strain  
212 SAG 11-32b.

## 213 Competing interests

214 There are no competing interests to declare.

## 215 References

- 216 **Alper J**, Geyer V, Mukundan V, Howard J. Reconstitution of flagellar sliding. In: *Meth. Enzymology*, vol. 524  
217 Elsevier; 2013.p. 343-369.
- 218 **Bessen M**, Fay RB, Witman GB. Calcium control of waveform in isolated flagellar axonemes of *Chlamydomonas*.  
219 *J Cell Biol.* 1980; 86(2):446-455.
- 220 **Bottier M**, Thomas KA, Dutcher SK, Bayly PV. How does cilium length affect beating? *Biophys J.* 2019;  
221 116(7):1292-1304.
- 222 **Brokaw CJ**. Direct measurements of sliding between outer doublet microtubules in swimming sperm flagella.  
223 *Science.* 1989 mar; 243(4898):1593-1596.
- 224 **Brokaw CJ**, Kamiya R. Bending patterns of *Chlamydomonas* flagella: IV. Mutants with defects in inner and outer  
225 dynein arms indicate differences in dynein arm function. *Cell Motil Cytoskeleton.* 1987; 8(1):68-75.
- 226 **Brokaw CJ**. Bend propagation by a sliding filament model for flagella. *J Exp Biol.* 1971; 55(2):289-304.
- 227 **Brokaw CJ**. Computer simulation of flagellar movement VIII: coordination of dynein by local curvature control  
228 can generate helical bending waves. *Cell Motil Cytoskeleton.* 2002; 53(2):103-124.
- 229 **Brokaw CJ**, Luck DJL. Bending patterns of *Chlamydomonas* flagella I. Wild-type bending patterns. *Cell Motility.*  
230 1983; 3(2):131-150.
- 231 **Brooks ER**, Wallingford JB. Multiciliated cells. *Curr Biol.* 2014; 24(19):R973-R982.
- 232 **Bui KH**, Yagi T, Yamamoto R, Kamiya R, Ishikawa T. Polarity and asymmetry in the arrangement of dynein and  
233 related structures in the *Chlamydomonas* axoneme. *J Cell Biol.* 2012; 198(5):913-925.
- 234 **Craige B**, Brown JM, Witman GB. Isolation of *Chlamydomonas* flagella. *Curr Prot Cell Biol.* 2013; 59(1):3-41.



- 235 **Daloglu MU**, Ozcan A. Computational imaging of sperm locomotion. *Biology of reproduction*. 2017; 97(2):182–  
236 188.
- 237 **Descloix A**, Großmayer KS, Bostan E, Lukes T, Bouwens A, Sharipov A, Geissbuehler S, Mahul-Mellier AL,  
238 Lashuel HA, Leutenegger M, Lasser T. Combined multi-plane phase retrieval and super-resolution optical  
239 fluctuation imaging for 4D cell microscopy. *Nature Photonics*. 2018 feb; 12(3):165–172.
- 240 **Do Carmo MP**. Differential geometry of curves and surfaces: revised and updated second edition. Courier  
241 Dover Publications; 2016.
- 242 **Dutcher SK**. Asymmetries in the cilia of *Chlamydomonas*. *Phil Trans Royal Soc B*. 2020; 375(1792):20190153.
- 243 **Elgeti J**, Kaupp UB, Gompper G. Hydrodynamics of sperm cells near surfaces. *Biophysical journal*. 2010;  
244 99(4):1018–1026.
- 245 **Faubel R**, Westendorf C, Bodenschatz E, Eichele G. Cilia-based flow network in the brain ventricles. *Science*.  
246 2016; 353(6295):176–178.
- 247 **Gadêlha H**, Hernández-Herrera P, Montoya F, Darszon A, Corkidi G. The human sperm beats anisotropically  
248 and asymmetrically in 3D. *bioRxiv*. 2019; p. 795245.
- 249 **Geissbuehler S**, Sharipov A, Godinat A, Bocchio NL, Sandoz PA, Huss A, Jensen NA, Jakobs S, Enderlein J, Van  
250 Der Goot FG, et al. Live-cell multiplane three-dimensional super-resolution optical fluctuation imaging. *Nature*  
251 *Commun*. 2014; 5:5830.
- 252 **Geyer V**. Characterization of the flagellar beat of the single cell green alga *Chlamydomonas reinhardtii*. PhD  
253 thesis, Sächsische Landesbibliothek-Staats-und Universitätsbibliothek Dresden; 2013.
- 254 **Goldstein RE**, Polin M, Tuval I. Noise and synchronization in pairs of beating eukaryotic flagella. *Phys Rev Lett*.  
255 2009; 103(16):168103.
- 256 **Gong A**, Rode S, Kaupp UB, Gompper G, Elgeti J, Friedrich BM, Alvarez L. The steering gaits of sperm. *Phil Trans*  
257 *Royal Soc B*. 2020; 375(1792):20190149.
- 258 **Guasto JS**, Johnson KA, Gollub JP. Oscillatory flows induced by microorganisms swimming in two dimensions.  
259 *Phys Rev Lett*. 2010; 105(16):168102.
- 260 **Hendel NL**, Thomson M, Marshall WF. Diffusion as a ruler: modeling kinesin diffusion as a length sensor for  
261 intraflagellar transport. *Biophys J*. 2018; 114(3):663–674.
- 262 **Hirokawa N**, Tanaka Y, Okada Y, Takeda S. Nodal flow and the generation of left-right asymmetry. *Cell*. 2006;  
263 125(1):33–45.
- 264 **Ishijima S**, Oshio S, Mohri H. Flagellar movement of human spermatozoa. *Gamete Res*. 1986; 13(3):185–197.
- 265 **Jikeli JF**, Alvarez L, Friedrich BM, Wilson LG, Pascal R, Colin R, Pichlo M, Rennhack A, Brenker C, Kaupp UB. Sperm  
266 navigation along helical paths in 3D chemoattractant landscapes. *Nature Commun*. 2015; 6:7985.
- 267 **Lighthill J**. Flagellar hydrodynamics. *SIAM Rev*. 1976; 18(2):161–230.
- 268 **Lin J**, Nicastro D. Asymmetric distribution and spatial switching of dynein activity generates ciliary motility.  
269 *Science*. 2018; 360(6387):eaar1968.
- 270 **Lin J**, Okada K, Raytchev M, Smith MC, Nicastro D. Structural mechanism of the dynein power stroke. *Nature*  
271 *cell biology*. 2014; 16(5):479–485.
- 272 **Lindemann CB**. A "geometric clutch" hypothesis to explain oscillations of the axoneme of cilia and flagella. *J*  
273 *Theor Biol*. 1994; 168(2):175–189.
- 274 **Lucy LB**. An iterative technique for the rectification of observed distributions. *Astronom J*. 1974; 79:745.
- 275 **Merola F**, Miccio L, Memmolo P, Di Caprio G, Galli A, Puglisi R, Balduzzi D, Coppola G, Netti P, Ferraro P. Digital  
276 holography as a method for 3D imaging and estimating the biovolume of motile cells. *Lab on a Chip*. 2013;  
277 13(23):4512–4516.
- 278 **Mitchison T**, Mitchison H. How cilia beat. *Nature*. 2010; 463(7279):308–309.

- 279 **Orbach R**, Howard J. The dynamic and structural properties of axonemal tubulins support the high length  
280 stability of cilia. *Nature Commun.* 2019; 10(1):1838.
- 281 **Pellicciotta N**, Hamilton E, Kotar J, Faucourt M, Degehr N, Spassky N, Cicuta P. Synchronization of mammalian  
282 motile cilia in the brain with hydrodynamic forces. *bioRxiv.* 2019; p. 668459.
- 283 **Polin M**, Tuval I, Drescher K, Gollub JP, Goldstein RE. *Chlamydomonas* swims with Two “Gears” in a Eukaryotic  
284 Version of Run-and-Tumble Locomotion. *Science.* 2009 jul; 325(5939):487–490.
- 285 **Richards B**, Wolf E. Electromagnetic diffraction in optical systems, II. Structure of the image field in an aplanatic  
286 system. *Proc Roy Soc London A: Math Phys Sci.* 1959; 253(1274):358–379.
- 287 **Richardson WH**. Bayesian-based iterative method of image restoration. *JOSA.* 1972; 62(1):55–59.
- 288 **Riedel-Kruse IH**, Hilfinger A, Howard J, Jülicher F. How molecular motors shape the flagellar beat. *HFSP J.* 2007;  
289 1(3):192–208.
- 290 **Ringo DL**. Flagellar motion and fine structure of the flagellar apparatus in *Chlamydomonas*. *J Cell Biol.* 1967;  
291 33(3):543–571.
- 292 **Rossi M**, Cicconofri G, Beran A, Noselli G, DeSimone A. Kinematics of flagellar swimming in *Euglena gracilis*:  
293 Helical trajectories and flagellar shapes. *PNAS.* 2017; 114(50):13085–13090.
- 294 **Sanchez T**, Welch D, Nicastro D, Dogic Z. Cilia-like beating of active microtubule bundles. *Science.* 2011;  
295 333(6041):456–459.
- 296 **Sartori P**, Geyer VF, Howard J, Jülicher F. Curvature regulation of the ciliary beat through axonemal twist. *Phys*  
297 *Rev E.* 2016 oct; 94(4).
- 298 **Sartori P**, Geyer VF, Scholich A, Jülicher F, Howard J. Dynamic curvature regulation accounts for the symmetric  
299 and asymmetric beats of *Chlamydomonas* flagella. *eLife.* 2016 may; 5.
- 300 **Satir P**, Christensen ST. Overview of structure and function of mammalian cilia. *Annu Rev Physiol.* 2007;  
301 69:377–400.
- 302 **Smith DJ**, Montenegro-Johnson TD, Lopes SS. Symmetry-breaking cilia-driven flow in embryogenesis. *Annu*  
303 *Rev Fluid Mech.* 2019; 51:105–128.
- 304 **Stein SC**, Huss A, Hähnel D, Gregor I, Enderlein J. Fourier interpolation stochastic optical fluctuation imaging.  
305 *Opt Express.* 2015; 23(12):16154–16163.
- 306 **Su TW**, Xue L, Ozcan A. High-throughput lensfree 3D tracking of human sperms reveals rare statistics of helical  
307 trajectories. *PNAS.* 2012; 109(40):16018–16022.
- 308 **Wan KY**, Leptos KC, Goldstein RE. Lag, lock, sync, slip: the many ‘phases’ of coupled flagella. *J Royal Soc Interface.*  
309 2014; 11(94):20131160.
- 310 **Wanner A**, Salathé M, O’Riordan TG. Mucociliary clearance in the airways. *Am J Resp Crit Care Med.* 1996;  
311 154(6):1868–1902.
- 312 **Wilson LG**, Carter LM, Reece SE. High-speed holographic microscopy of malaria parasites reveals ambidextrous  
313 flagellar waveforms. *PNAS.* 2013; 110(47):18769–18774.
- 314 **Witman GB**. Isolation of *Chlamydomonas* flagella and flagellar axonemes. In: *Meth. Enzymology*, vol. 134 Elsevier;  
315 1986.p. 280–290.
- 316 **Witman GB**, Plummer J, Sander G. *Chlamydomonas* flagellar mutants lacking radial spokes and central tubules.  
317 Structure, composition, and function of specific axonemal components. *J Cell Biol.* 1978; 76(3):729–747.
- 318 **Wolf E**. Electromagnetic diffraction in optical systems-I. An integral representation of the image field. *Proc Roy*  
319 *Soc London A: Math Phys Sci.* 1959; 253(1274):349–357.
- 320 **Woolley DM**, Vernon GG. Alternating torsions in a living ‘9+ 2’ flagellum. *Proc Roy Soc London B: Biol Sci.* 1999;  
321 266(1425):1271–1275.
- 322 **Xu C**, Prince JL. Gradient vector flow: A new external force for snakes. In: *IEEE Proc. CVPR IEEE*; 1997. p. 66–71.
- 323 **Xu C**, Prince JL, et al. Snakes, shapes, and gradient vector flow. *IEEE Trans Image Proc.* 1998; 7(3):359–369.

324 **Appendix 1**

325 **Setup calibration**

326 The multi-plane beam-splitter (Fig. 1) splits the collected light into eight channels which are  
327 imaged in parallel on two cameras. The splitter was designed to render four adjacent chan-  
328 nels with interleaved lateral distance of  $d = 3.2$  mm in between which fits in size to width of  
329 the  $13.3 \times 13.3$  mm pixel area of our sCMOS detector (ORCA-Flash 4.0 V2, Hamamatsu). Re-  
330 garding focus of the camera 1 as the reference, the camera 2 is displaced from the focus by  
331 a distance of  $4d/n$  where  $n = 1.46$  is the refractive index of the prism material. In other words,  
332 with respect to the prism outputs, camera 2 is positioned by distance of  $4d/n$  more away  
333 than the camera 1. This allows one to obtain an optical path difference of  $\sim d/n$  between  
334 sequential planes. To calibrate this system, we performed z-scans of immobilized green  
335 fluorescent beads of 200 nm diameter (FluoSpheres™ Carboxylate Microspheres, 0.2  $\mu\text{m}$ ,  
336 yellow green fluorescent (505/515), Thermo Fisher Scientific) that were spin-coated on a  
337 glass coverslide, using an oil immersion phase objective (60 $\times$ , 1.25 NA) and the relay lens  
338 system shown in Fig. 1. Fluorescence excitation was done at 470 nm with a LED, and the  
339 objective was moved over an axial scan range of 6  $\mu\text{m}$  with 100 nm step size. Fig. 1a displays  
340 multi-plane image acquisition of fluorescent beads at one z-scan step.

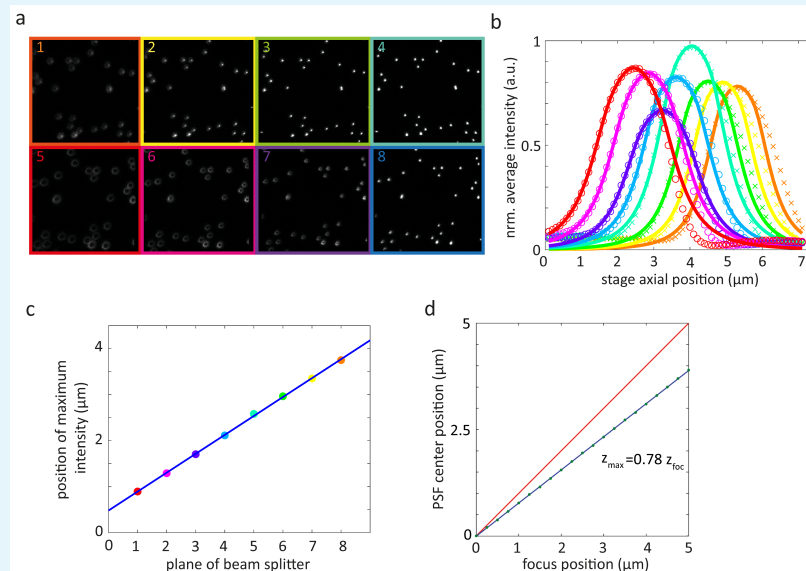

341 **Appendix 1 Figure 1.** Inter-plane distance and brightness calibration. (a) Example of the eight images  
342 of fluorescent beads recorded by the multi-plane wide-field microscope. In this example, beads are in  
343 focus in nominal plane #4 (b) Normalized average intensity in each image plane as a function of axial  
344 scan position (for axial scan steps of 100 nm). Crosses (for camera 1) and open circles (for camera 2)  
345 represent measured data, solid lines are Gaussian fits. (c) Linear fit of positions of intensity maxima  
346 from panel (b). The fit yields an average inter-plane distance of  $\sim 430$  nm (for oil immersion). (d)  
347 Relative shift of focal plane position in water (blue line) with respect to oil (red line). Open circles are  
348 the result of a wave-optical calculation of imaging in water, the blue solid line is a linear fit to this  
349 result. It shows that close to the glass interface, we still find a linear relationship between focal plane  
350 position and the objective's axial position, but inter-plane distance in water is by a factor of 0.78  
351 smaller than in oil.  
352

A plot of the total intensity recorded in each of the eight planes as a function of axial position of the objective together with Gaussian fits is shown in Fig. 1b. A linear fit of the position of their maxima as a function of axial position of the objective, Fig. 1c, yields an average inter-plane distance of  $\sim 430$  nm. The corresponding inter-plane distance in water

356

357

358

359

360

361

362

363

364

365

366

367

shrinks by a factor of 0.78 due to the refractive index mismatch between immersion oil and water, as numerically calculated using the full wave-optical theory developed by Wolf and Richards **Wolf (1959); Richards and Wolf (1959)**. The result of these calculations, Fig. 1d, shows how the axial center of the PSF in water (blue line) deviates from its position it would have in glass/oil (red line). Thus, our multi-plane system allows us to record a sample volume of  $\sim 40 \times 40 \times 2.4 \mu\text{m}$  in an aqueous medium.

The area under each curve in Fig. 1b is the relative amount of light that is recorded in each of the eight channels. These numbers,  $\epsilon(\text{plane \#})$ , are required later for correcting the slight brightness variations between different planes that originate from a non-perfect equal division of light by the beam splitter ( $\pm 11.7\%$  s.d. of averaged brightness).

368 **Appendix 2**

369 **Work flow from raw data to registered 3D image stack**

370 *Image acquisition.* Images in eight focal planes, divided into two groups of four upper and  
371 four lower planes, are simultaneously acquired by camera 1 and camera 2, respectively  
372 (Fig. 1a,b). Images of camera 1 are horizontally flipped to have the same orientation as  
373 those of camera 2.

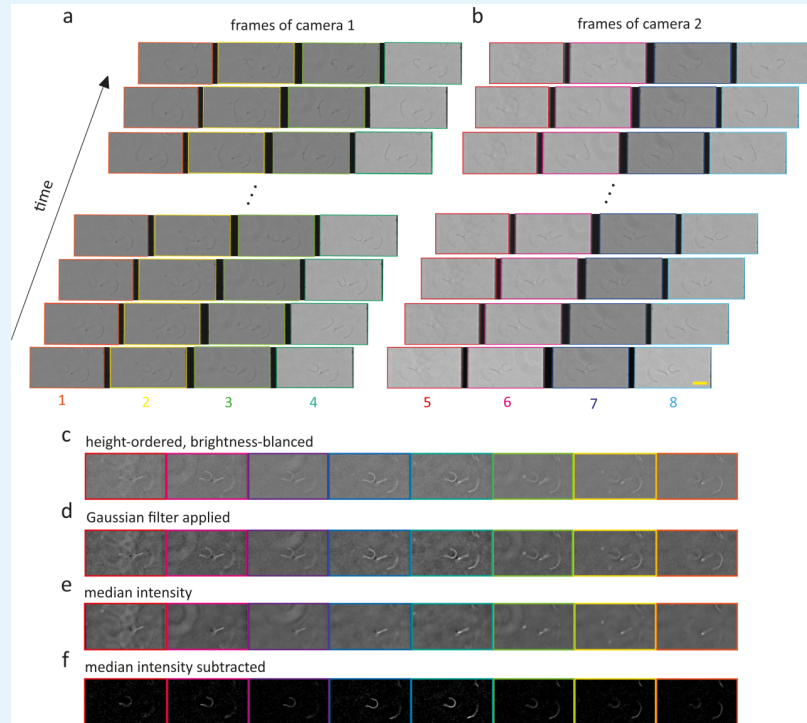

374 **Appendix 2 Figure 1.** Image acquisition, registering and filtering. (a,b) Four phase contrast images  
375 acquired by camera 1 (bottom planes) and camera 2 (top planes), respectively. Length of yellow scale  
376 bar in (b) is 10  $\mu\text{m}$ . (c) Image intensities are inverted (for better contrast) and planes are ordered  
377 following their distance from the surface, from left (bottom) to right (top). Brightness values of all  
378 planes are balanced using the  $\epsilon(\text{plane \#})$  values from the calibration measurement. (d) Image noise is  
379 reduced by applying a 2D Gaussian low pass filter. (e) Median intensity of each plane over 1980  
380 frames. (f) Subtraction of median intensity images for enhancing image contrast.  
382

383 *Brightness correction, image conversion, and Gaussian filtering.* Intensity values in all eight  
384 image planes are balanced by multiplying with the corresponding weight factors  $\epsilon^{-1}$  (Fig. 1c).  
385 All image values are inverted to negative numbers for contrast enhancement and better  
386 visualization of axonemes (Fig. 1c). For noise reduction, a 2D Gaussian kernel (`imgaussfilt`  
387 function in MATLAB) with standard deviation of  $\sigma = 2$  is used for low-pass frequency filtering  
388 (Fig. 1d).

389 *Subtraction of median intensity.* Median intensity of each plane determined over all frames  
390 (Fig. 1e) is subtracted from data to remove all contributions from immobile and static sources.  
391 This also increases the SNR by a factor of 3 to 5 times, depending on signal strength (Fig. 1f).

*Co-registration of planes.* The eight raw images have slight relative shear to each other  
(Fig. 2a) and have to be registered. This is done by calculating the two-dimensional cross-  
correlation of each plane to one reference plane (either plane #4 or plane #5 close to the  
center of the stack) (Fig. 2b). The peak position of this cross-correlation gives direction and  
value of the relative shift of the considered plane with respect to the reference plane. This

395

396

397

398

399

400

shift estimation is refined by repeating the procedure on Fourier up-sampled images, see *Stein et al. (2015)*. Using these values, all images are registered to a common frame with sub-pixel precision (Fig. 2c,d). Non-overlapping image borders arising from registration are cropped in the final aligned image stack (Fig. 2d,e).

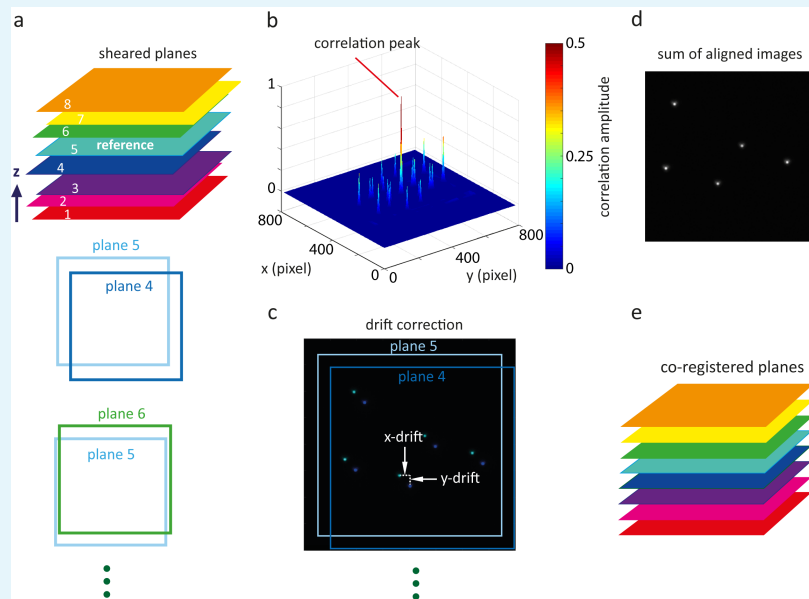

401

402

403

404

405

406

407

**Appendix 2 Figure 2.** Shear correction. (a) Example of plane shearing where fifth plane from bottom is considered as reference image. (b) Cross-correlation between one plane with reference. Peak position defines direction and value of shear between considered plane and reference plane. (c) Shear correction between plane 4 and 5. (d) Overlay of aligned planes 4 and 5. (e) Shear-corrected image stack of eight planes.

408

409

410

411

412

413

414

415

416

417

418

419

420

421

422

423

424

425

426

427

428

*Image sharpening.* Images of *Chlamydomonas* axonemes with diameter of  $\sim 150$  nm (much smaller than the illumination wavelength used). Note that the basal end of the axoneme is slightly ( $\sim 10\%$ ) thicker than its distal tip *Geyer (2013)*, but otherwise all axonemes show an almost homogeneous image intensity along their contour length. Thus, the shape of an axoneme can be effectively considered as a continuous one-dimensional line in three-dimensional space. This *a priori* information can be used for a three-dimensional image deconvolution. Each frame of the multi-plane image stack is deconvolved using a pre-calculated aberration-free PSF at the interface of glass coverslide and water (Fig. 3a). This PSF is calculated using the full wave-optical theory developed by Richards and Wolf *Wolf (1959); Richards and Wolf (1959)* and the optical parameters of our setup (imaging wavelength  $\lambda_{peak}$  of 585 nm, numerical aperture NA of 1.25, image magnification of 80 $\times$ , principal focal length of objective of 3 mm, and water and oil refractive index values of  $n_{water} = 1.33$  and  $n_{glass} = 1.52$ , respectively). Within a small axial distance from the surface, this PSF remains an excellent approximation of the actual ones despite refractive index mismatch, as can be seen by comparing its shape at a nominal focus position of  $\sim 1.5$   $\mu\text{m}$  above the surface (Fig. 3b) with the aberration-free PSF directly at the surface (Fig. 3a). For deconvolution, we performed ten iterations using a 3D Lucy-Richardson algorithm *Richardson (1972); Lucy (1974)* (`deconvlucy` function in MATLAB) which results in a sharpening of the axoneme contour by a factor of  $\sim 2$  in all directions. Fig. 3c,e present an axoneme image maximum-projected along the optical axis and along the  $y$ -direction, respectively. Corresponding deconvolved images are shown in Fig. 3d,f.

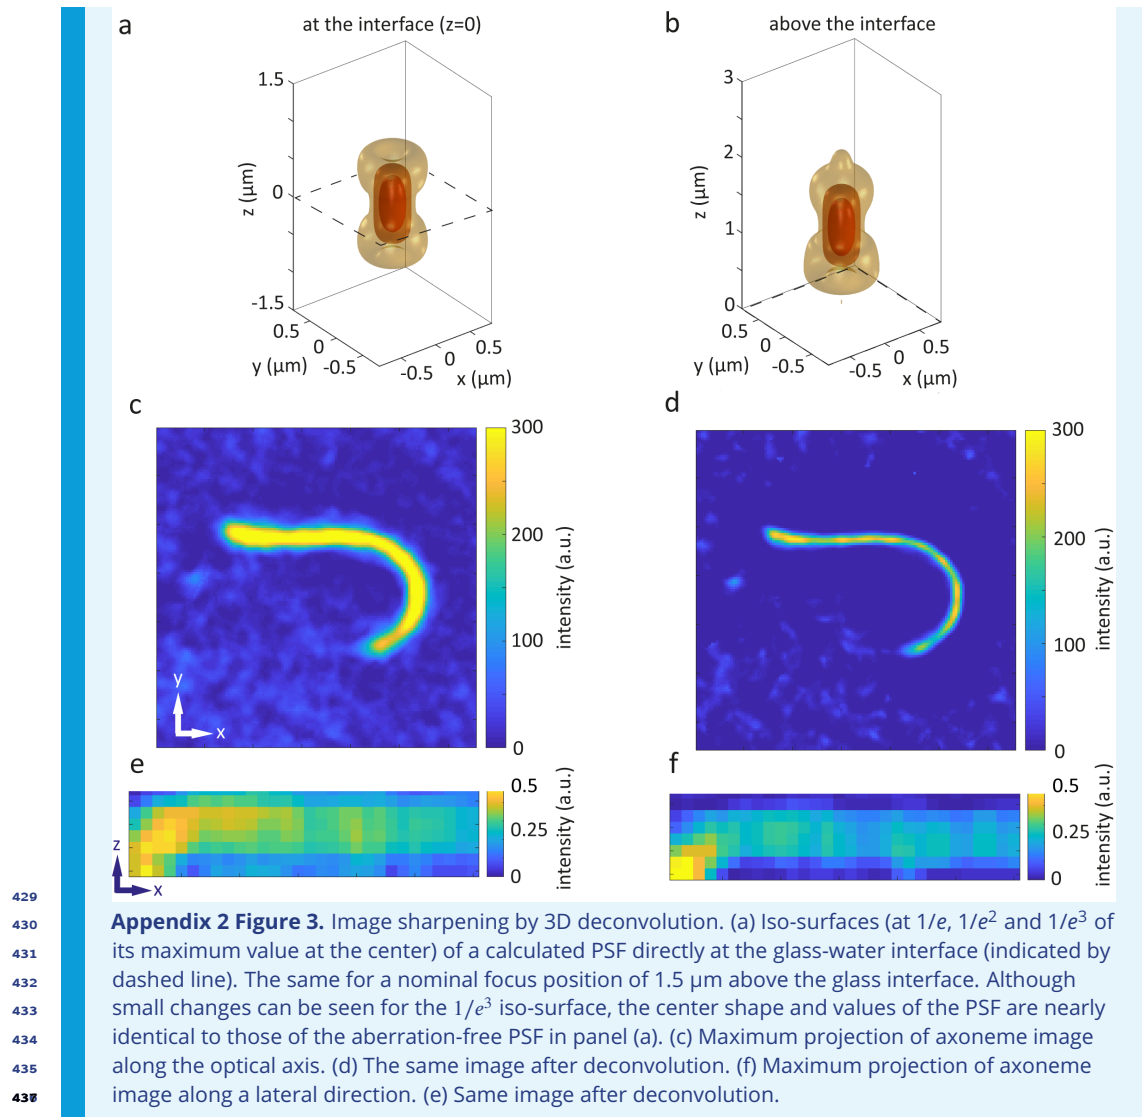

### 438 Appendix 3

#### 439 3D tracking

440 Tracking of an axoneme is performed by first finding its 2D contour in the 2D maximum  
441 intensity projections using a GVF snake *Xu and Prince (1997); Xu et al. (1998)* (Fig. 1a,b). For  
442 the first frame, the user selects a region of interest that should contain only one single ax-  
443 oneme. Then, the user initializes the snake by drawing a polygonal line along the contour of  
444 the axoneme (Fig. 1c) which estimates the contour length. In the same frame, the polygonal  
445 line is interpolated to  $N = 30$  points and used as a starting guess for the snake algorithm  
446 (Fig. 1d). The GVF is calculated using 20 iterations and a GVF regularization coefficient of  
447  $\mu = 0.1$ . The snake is then deformed to the contour in the next frame according to the GVF  
448 where we have adapted the original algorithm by Xu and Prince for open boundary condi-  
449 tions *Xu et al. (1998)*.

450 In a next step, a height profile  $h_i(z)$  is created for each segment  $i$ , averaging the intensity  
451 over pixels of the segment (Fig. 1e). This profile is fitted with a 1D Gaussian (Fig. 1f). The  $z$ -  
452 position of the maximum of this fit yield the axial coordinate  $z_i$  of the segment, and together  
453 its lateral positions  $x_i$  and  $y_i$  constitute the 3D coordinates of segment  $i$ .

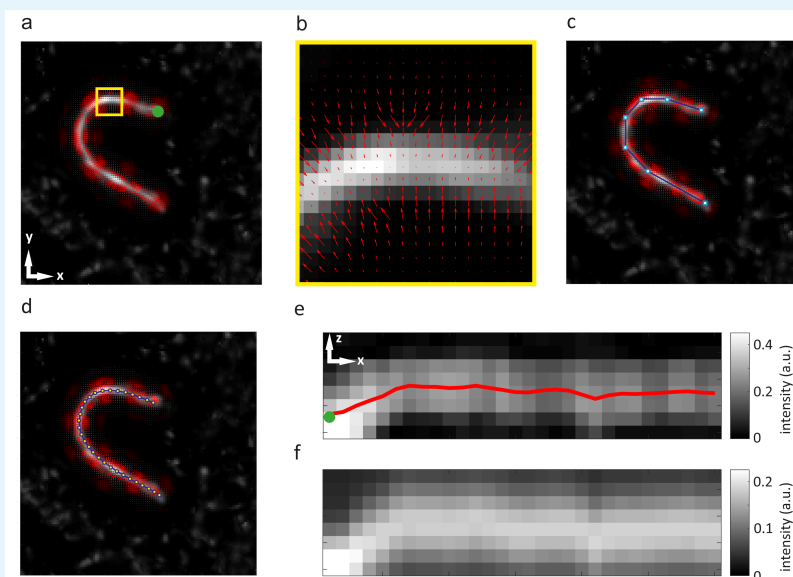

454 **Appendix 3 Figure 1.** 3D tracking of axonemal motion. (a) Maximum intensity projection of axoneme  
455 image (green dot indicates basal end). (b) Calculated vector for small yellow region of panel (a),  
456 converging toward pixels with maximum intensity. (c) A polygonal line with seven nodes along the  
457 contour snake. (d) Division of snake into 30 segments. (e) Vertical cross section of axonemal image  
458 and contour (green dot indicates basal end). (f) Same as (e), but after fitting axial intensity distribution  
459 at each lateral position with a 1D Gaussian.  
460

462 An installation file 'AxonemeTracking3D.mlappinstall' for a platform-independent MAT-  
463 LAB app together with its source code ('source code.zip') and sample data ('testdata.mat')  
464 can be downloaded at: <https://www.dropbox.com/s/x8iequg72zmkx4b/FlagellumAnalysis.zip?dl=0>. This app executes the contour determination and contour discretization of 3D ax-  
465 oneme images. The zip-file contains also the commented MATLAB program 'FlagellumAnaly-  
466 sisExample.m' together with tracking data ('result\_tracking22.mat') of the flagellum analyzed  
467 for Fig. 3a,b which demonstrates the calculation of curvature and torsion from a discretized  
468 contour, and their graphical display.  
469



470 **Appendix 4**

471  
472  
473  
474  
475  
476  
477  
478  
479  
480

### Contour fitting

As described in the main text, contour fitting of the three-dimensional contour obtained from the 3D tracking procedure was done by a polynomial fit of the determined discrete 3D coordinates. Such a fit become ambiguous at the ends of the tracked contour which can lead to unphysically large values of curvature at these ends. To prevent this, we have padded a discretized contour on both ends by mirrored inner points. The impact of the number of padded points on the fit results is shown in Fig. 1. As can be seen, the absolute values of curvature at the contour ends become smaller with increasing contour padding, but the values in the middle of the contours remain mostly unchanged, similar to the torsion values.

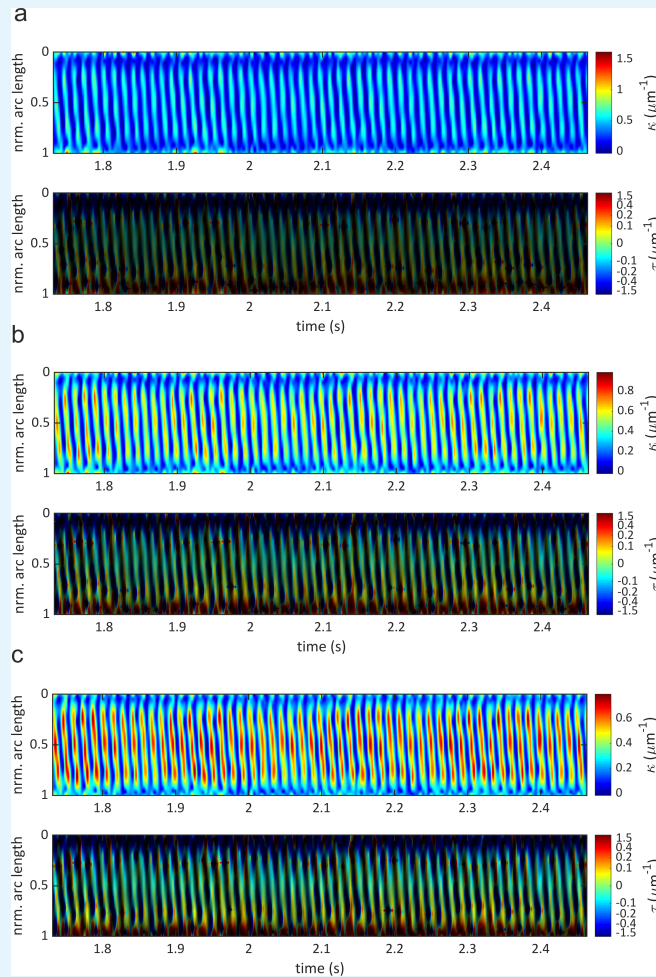

481  
482  
483  
484  
485  
486  
488

**Appendix 4 Figure 1.** Effect of contour padding on calculated curvature and torsion. (a) Zero padding, (b) padding with one extra point, (c) padding with two extra points. Compare with Fig. 3 in main text showing results for padding with three extra points. As can be seen, padding does mostly suppress excessive curvature values at contour ends, but does nearly not change curvature values elsewhere, and has little impact on torsion values (different brightness values in torsion plots are due to different dynamic range of curvature values).

Using the results of the polynomial fits, we estimated the fit accuracy (and checked for any systematic fit bias) by histogramming the difference between the discrete coordinates

489

490

491

492

493

494

495

496

497

498

499

as delivered by the axoneme tracing algorithm and the positions calculated from the polynomial fit. The resulting histograms for both axonemes analyzed in Fig. 3 are shown in Fig. 2. The symmetry of the residual histograms indicates that there is no systematic bias of the polynomial fit that would lead to skewed asymmetric distributions of the residuals. The width of the distributions gives an estimate of the accuracy of the contour position determination. The standard deviations of each distribution are indicated above each histogram. We attribute the fluctuations of the discretized positions (as delivered by the tracing algorithm) around the smooth polynomial fit to noise-induced uncertainties of the contour tracing.

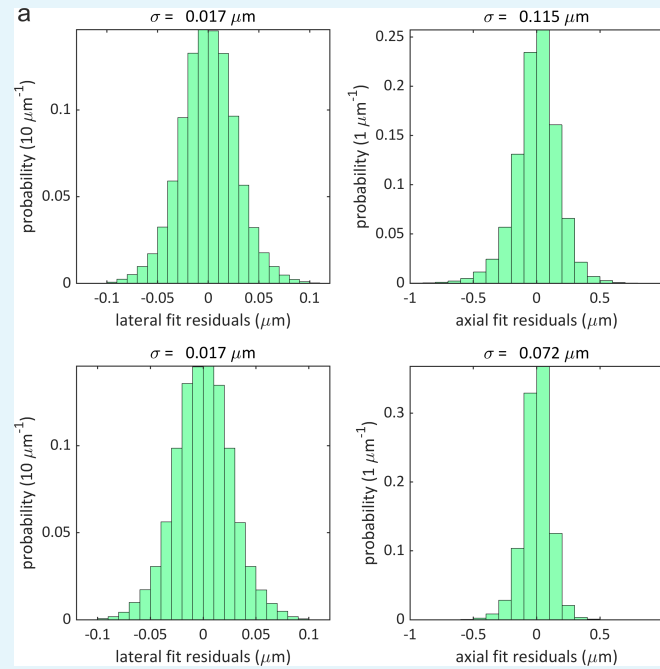

500

501

502

503

504

**Appendix 4 Figure 2.** Distributions of residuals between discretized and fitted position values for (a) flagellum of Fig. 3a,b and (b) for flagellum of Fig. 3c,d. Left panels show residuals for lateral x,y-positions, right panels for axial z-positions. Calculated standard deviation values for all distributions are given on top of each panel.

506 **Appendix 5**

507 **List of hardware components used in multi-plane phase contrast mi-**  
508 **croscope**

| Component          | Details                                                                                                                 |
|--------------------|-------------------------------------------------------------------------------------------------------------------------|
| white light source | 100 W 12 V Halogen Lamp U-LH100L-3, Olympus, peak wavelength ~585 nm                                                    |
| phase annulus      | IX-PH3, 35 mm diameter, Olympus                                                                                         |
| condenser lens     | IX2-LWUCD Universal Condenser, Olympus, NA 0.55, WD 27 mm                                                               |
| microscope stage   | ES107IX2, Prior scientific instruments, 115 × 77 mm travel range, 1 μm step size resolution, OptiScan ES107 Controller, |
| phase objective    | UPLFLN 60XOIPH, 0.65-1.25 NA, Olympus                                                                                   |
| tube lens          | $f_{TL} = 180$ mm, Olympus                                                                                              |
| field aperture     | SP 40 slit, Owis                                                                                                        |
| telescope lenses   | $f_{L1} = 150$ mm, $f_{L2} = 200$ mm, achromatic doublets, AC254-150-A-ML, AC254-200-A-ML, Thorlabs                     |
| prism              | Corning C-7980, $n_D = 1.458$ , Abbe number $v = 67.8$ , see section 6.2 in SI of ref. <b>Descloux et al. (2018)</b>    |
| camera             | ORCA-Flash 4.0 V2, Hamamatsu, pixel size = 6.5 μm                                                                       |

510 **Appendix 5 Table 1.** Specifications of components incorporated into the multi plane phase contrast  
512 microscope
